# Supplementary material for: LDL Affects the Immunomodulatory Response of Endothelial Cells by Modulation of the Promyelocytic Leukemia Protein (PML) Expression via PKC
Source: MDPI journal article supplement (doi:10.3390/ijms24087306), 2023-04-15
Supplement: s1 [file s1]

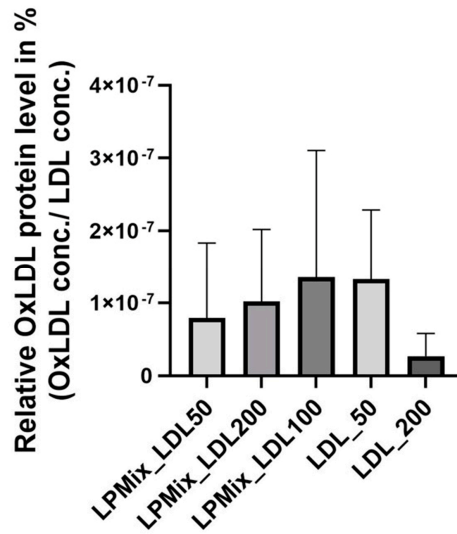

**Figure S1. Relative OxLDL protein levels in LPMix and purified LDL fractions.** ELISA was performed to determine OxLDL concentration in LPMix supplemented with LDL in different concentrations and with high or low concentrations of purified LDL. Expression values relative to LDL concentrations.  $n = 4$ . Graph is shown as mean  $\pm$  SD.

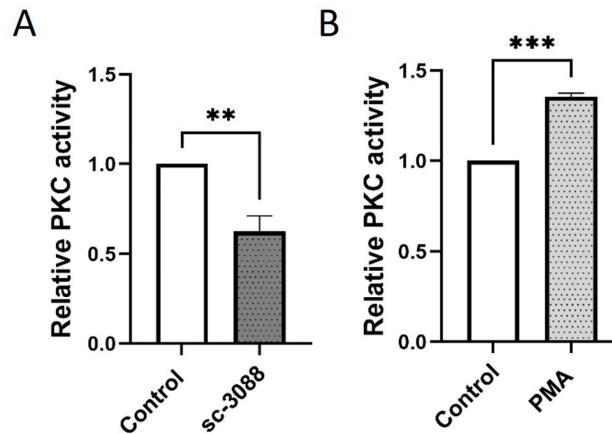

**Figure S2. Effect of sc-3088 and PMA on PKC activity in endothelial cells.** A, B ELISA was performed to determine PKC activity in EA.hy926 cell extracts either incubated with DMSO (control) or incubated with the PKC-peptide inhibitor sc-3088 (1  $\mu$ M) (A) or the PKC activator PMA (80 nM) (B) for 24 h.  $n = 3$ , Student's  $t$ -test. All graphs shown as mean  $\pm$  SD, \*\*  $p < 0.01$ , \*\*\*  $p < 0.001$ .
